# Supplementary material for: A structural inventory of native ribosomal ABCE1‐43S pre‐initiation complexes
Source: PubMed Central journal article supplement — EMBO J. 2020 Dec 8;40(1):e105179. doi: 10.15252/embj.2020105179 (PMC7780240; doi:10.15252/embj.2020105179), 2020-12-08
Supplement: EMBJ-40-e105179-s003.pdf [file EMBJ-40-e105179-s003.pdf]

# Appendix

## Table of contents

|                                                                                                           |    |
|-----------------------------------------------------------------------------------------------------------|----|
| Appendix Figure S1 - Sorting scheme for the yeast native 40S sample and the 43S-PIC-XL sample.            | 2  |
| Appendix Figure S2 - Sorting scheme for the human native small 40S sample.                                | 3  |
| Appendix Figure S3 - Overview and resolution of the yeast 43S PIC and 48S IC.                             | 5  |
| Appendix Figure S4 - Sample preparation and cryo-EM structure of the yeast 43S PIC-XL.                    | 6  |
| Appendix Figure S5 - Crosslink derived connectivity network of the yeast ABCE1 43S PIC.                   | 7  |
| Appendix Figure S6 - Corrected register shifts in the helices of the PCI-MPN core in the human 43S PIC.   | 8  |
| Appendix Figure S7 - Position of the eIF3 YLC and the eIF3a-CTD in yeast and human 43S PICs.              | 9  |
| Appendix Figure S8 - Position of the eIF3g or eIF4b RRM and density in the mRNA channel.                  | 10 |
| Appendix Figure S9 - Molecular interactions of the TC in the complete human 43S PIC.                      | 11 |
| Appendix Table S1 - Data collection, refinement, and model composition of the yeast initiation complexes. | 12 |
| Appendix Table S2 - Data collection, refinement, and validation statistics of the human 43S PIC.          | 13 |
| Appendix Table S3 - Crosslinks identified on a yeast ABCE1-43S PIC.                                       | 14 |
| Appendix Table S4 - Molecular interactions between eIF3 subunits and 40S.                                 | 19 |
| Appendix Text 1 - Molecular interactions between eIF3j and the 40S subunit in the yeast 43S-PIC.          | 20 |
| Appendix References                                                                                       | 21 |

**A**

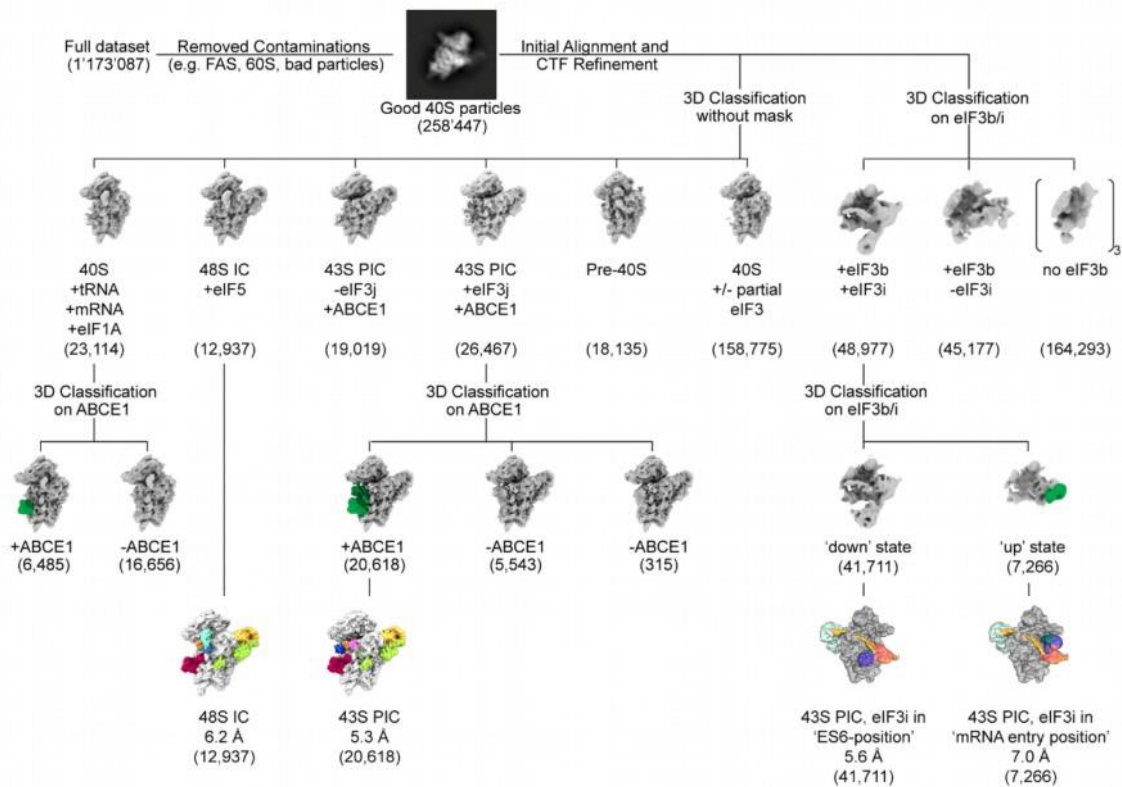

**B**

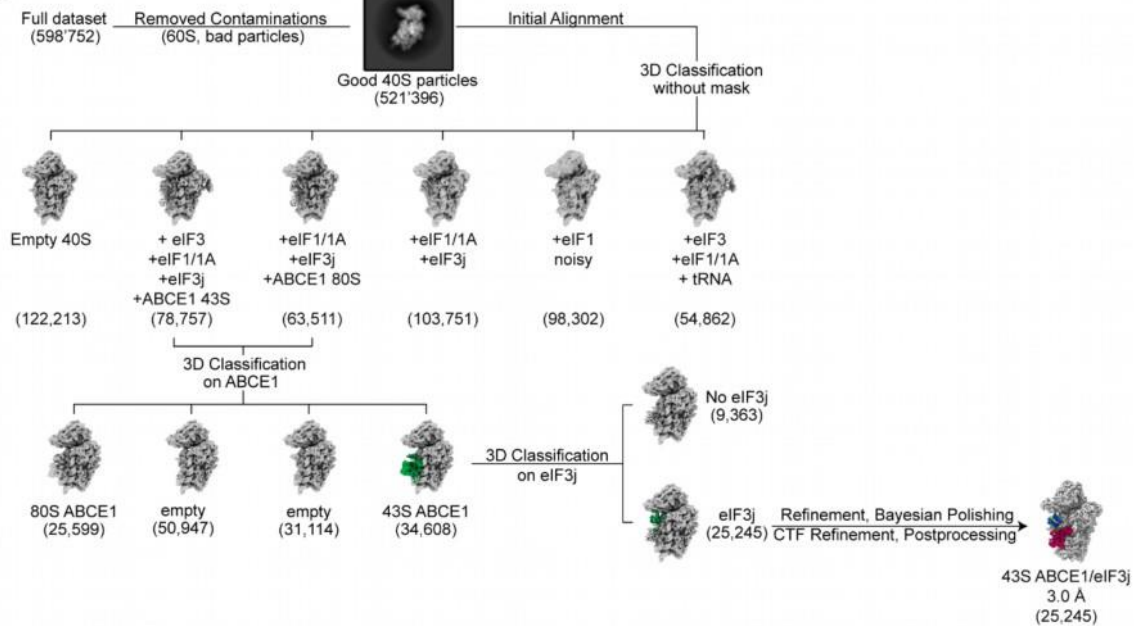

**Appendix Figure S1 - Sorting scheme for the yeast native 40S sample and the 43S-PIC-XL sample.**

A After 2D classification of the full dataset, approximately 260,000 particles representing 40S subunits were selected. By 3D classification into six classes, 29% of the particles were unambiguously identified as pre-initiation complexes, amongst them a 43S PIC class containing eIF1, eIF1A, eIF3 and ABCE1 with stably bound eIF3j and one class representing a partial 48S initiation complex containing eIF1A, eIF3, eIF5, the TC, and ABCE1. The 48S IC was refined to 6.2 Å and the eIF3j-containing 43S was sub-classified for ABCE1, yielding a 5.3 Å

reconstruction of the 43S PIC. In total, 62% of the found initiation-factor-containing 40S particles contained ABCE1 after focused classification for ABCE1 presence. Independently, focused classification on the particles containing the eIF3b/i/g module was performed to assess conformational distribution of eIF3i/g with respect to eIF3b. 85% of the particles contained eIF3i in the “ES6-position”, while in 15% of particles, eIF3i was in the “mRNA entry-position”.

B After 2D classification of the full dataset, 521,396 particles representing 40S subunits were selected. By 3D classification into six classes, two classes containing ABCE1 were identified. These were subclassified by sequentially using a mask on the ABCE1 region as well as a mask on eIF3j, in order to identify one class containing both eIF3j and ABCE1 in the semi-open conformation as observed in the native sample. This class represents 4.8% of the total dataset and was refined to 3.0 Å.

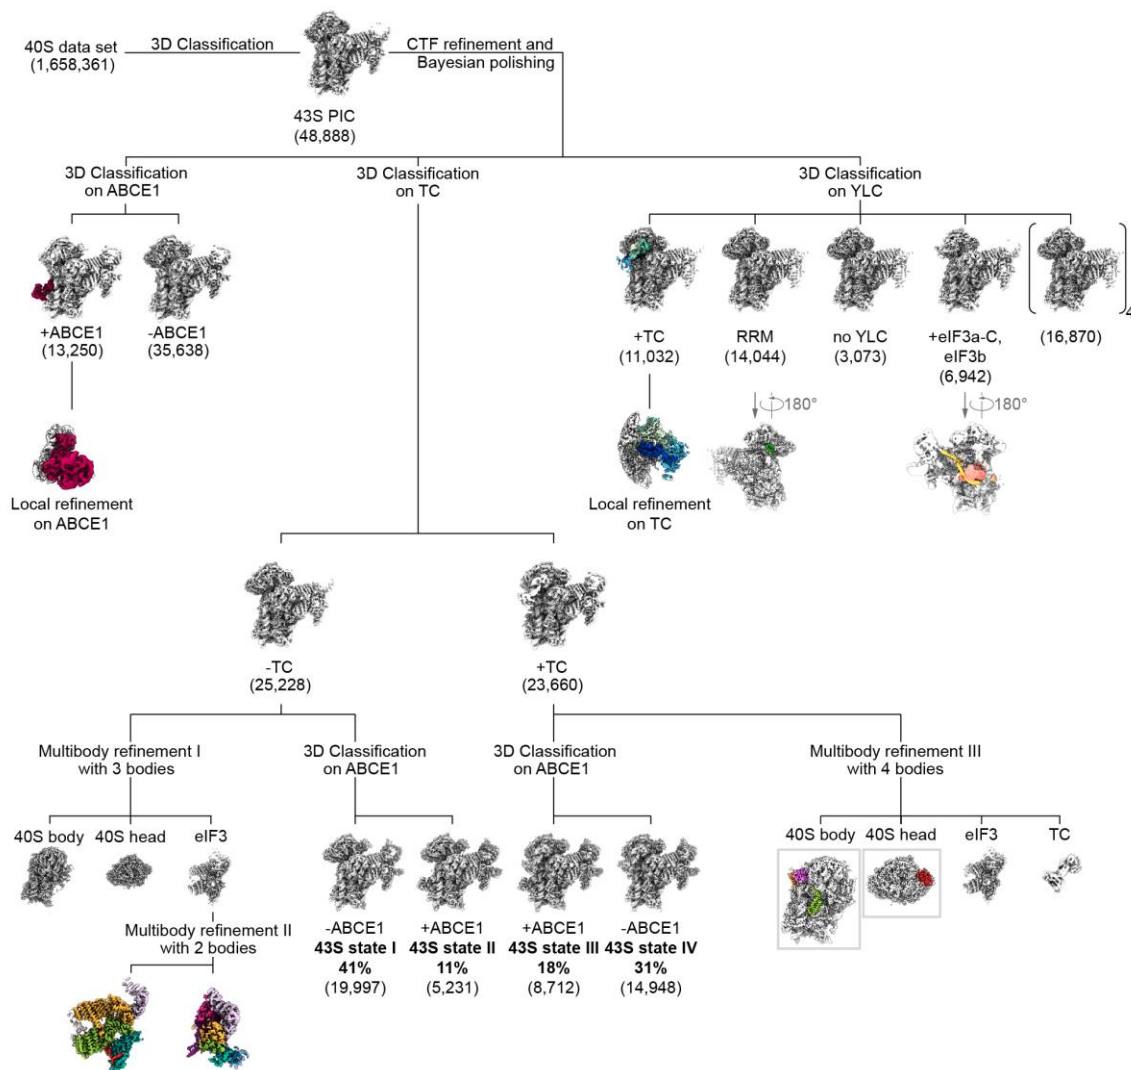

### Appendix Figure S2 - Sorting scheme for the human native small 40S sample.

The data set was first classified for presence of initiation factors (see Materials and Methods). 2.9% of all particles contained the eIF3 PCI-MPN core at the back side of the 40S and partial densities for the YLC at the mRNA entry site, the TC in the ISS, and ABCE1. Focused classifications were performed using a binary mask with soft edges

to obtain homogenous populations of 43S complexes. Focused classification on the TC yielded two classes with and without the TC that also differed in the conformation of the 40S head (closed latch without TC and P<sub>OUT</sub> state). These two classes were sub-classified focusing on ABCE1, yielding the four main classes shown in Fig. 2. To obtain the highest possible resolution, we independently performed multi-body refinements on TC-bound and -unbound classes. The TC-lacking class containing the eIF3-PCI-MPN core was refined in two steps: first, the 43S was divided into three bodies (40S body, 40S head and eIF3; multi-body refinement I). Then the body containing the eIF3-PCI-MPN core was re-centered, the 40S SSU signal subtracted and a multi-body refinement with two bodies was performed (multi-body refinement II) that were used for model building. Particles containing the TC were subjected to multi-body refinement III with four bodies (40S body and head, eIF3-PCI-MPN core and TC) yielding well-resolved densities for the eIF3c-NTD on the body and eIF3d on the head used for model building. Classification of the entire 43S data set focusing on ABCE1 followed by focused refinement yielded a well-resolved map from 27% ABCE1-containing particles used for model building. Focused classification on the YLC revealed various compositional and conformational states. One class represented a very stable complete 43S complex in P<sub>OUT</sub> state and focused refinement yielded a well-resolved map of the TC used for model building. A focused refinement resulted in the best resolved map for the TC, which could be used for model building; two other classes were enriched in stably bound YLC, one showing the clear connection between the PCI-MPN core and the YLC and one with a well-resolved density for a RRM adjacent to the mRNA entry site and density in the mRNA channel.

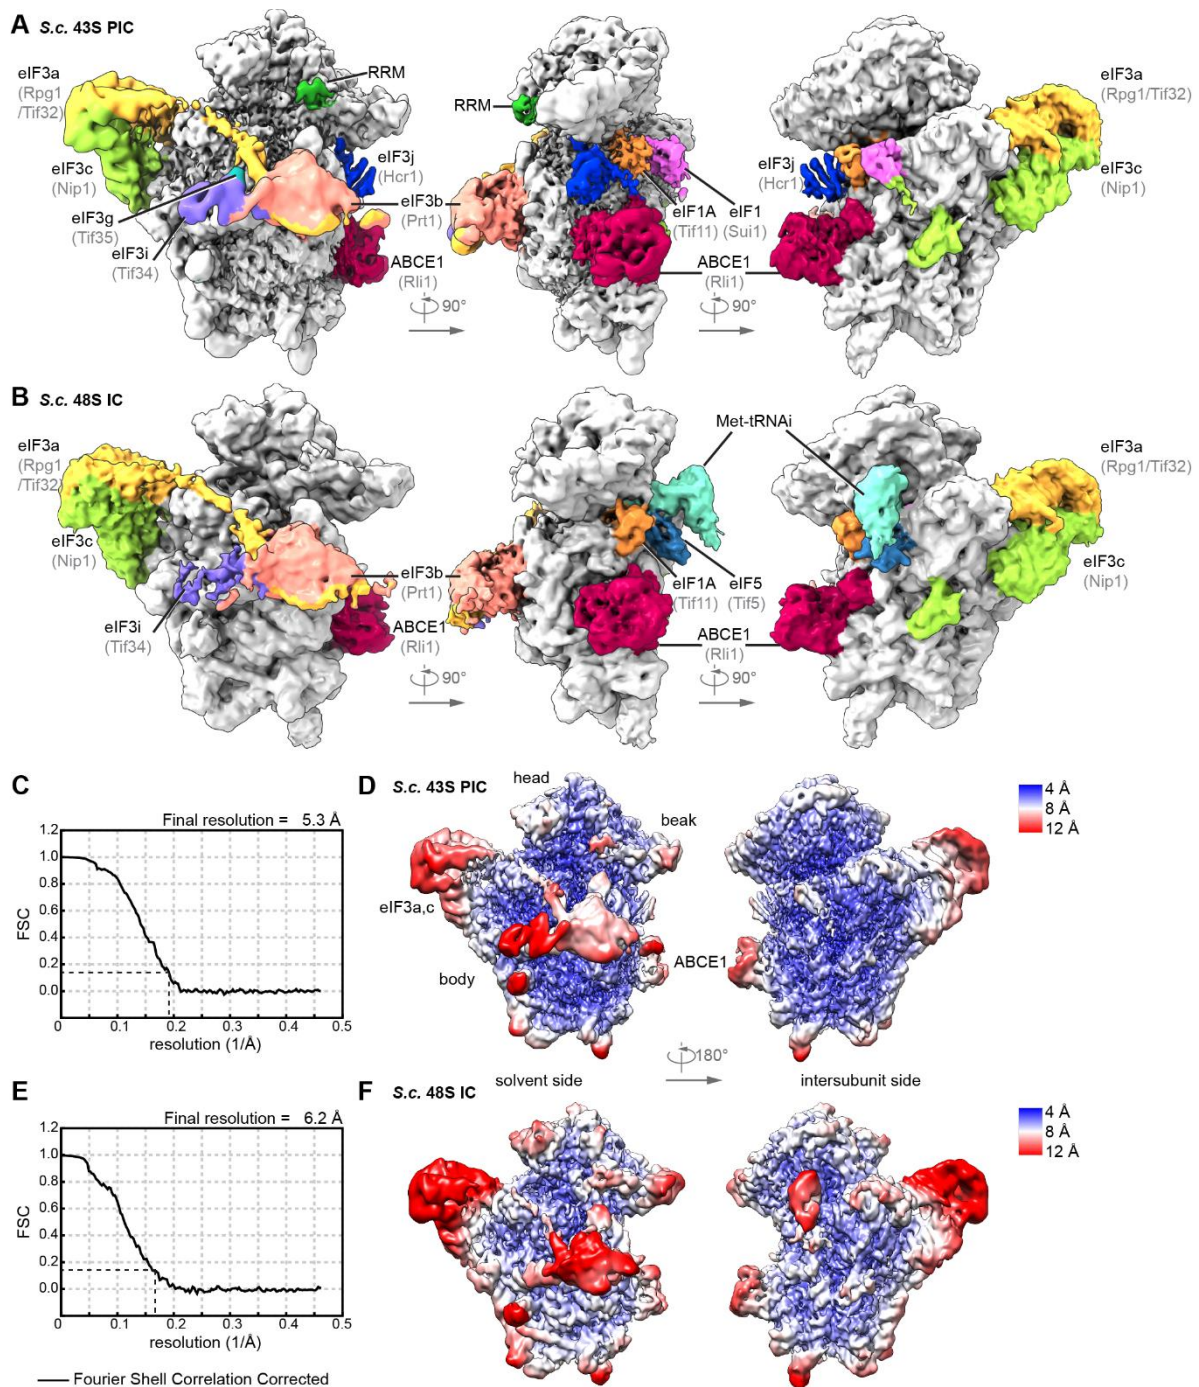

**Appendix Figure S3 - Overview and resolution of the yeast 43S PIC and 48S IC.**

A, B Three views on the 3D reconstructions of the yeast 43S PIC (A) and the 48S IC (B) low-pass filtered according to local resolution.

C, D Gold standard Fourier Shell Correlation (FSC) curve (C) and 3D reconstruction the yeast 43S PIC colored and filtered according to local resolution (D).

E, F Gold standard Fourier Shell Correlation (FSC) curve (E) and 3D reconstruction the yeast 48S IC colored and low-pass filtered according to local resolution (F).



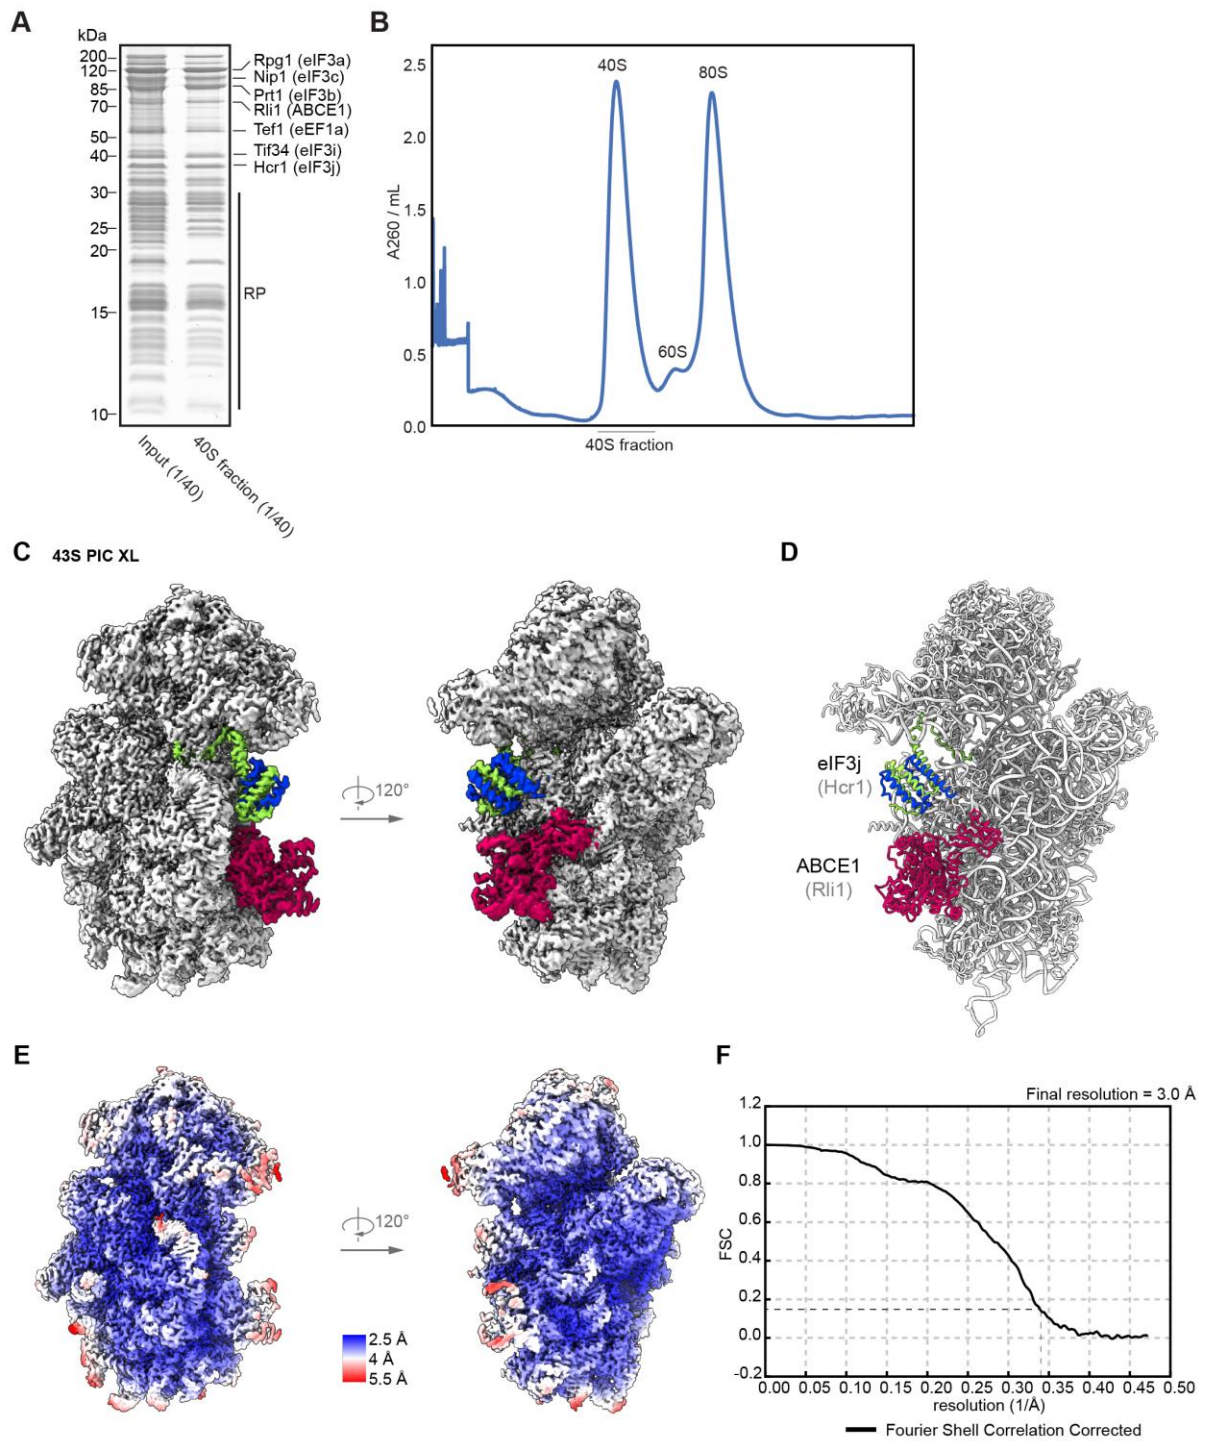

**Appendix Figure S4 - Sample preparation and cryo-EM structure of the yeast 43S PIC-XL.**

A SDS-PAGE gel of the Nip1-TAP pullout sample before and after sucrose gradient purification.

B UV profile from Nip1-TAP pullout elution fraction separated on a sucrose gradient (10–50%) by ultracentrifugation.

C Two views of the 3D reconstruction of the yeast 43S PIC-XL, low-pass filtered at local resolution.

D Atomic model of the yeast 43S PIC-XL.

E, F 3D reconstruction the yeast 43S PIC-XL colored and low-pass filtered according to local resolution (E) and gold standard Fourier Shell Correlation (FSC) curve (F).

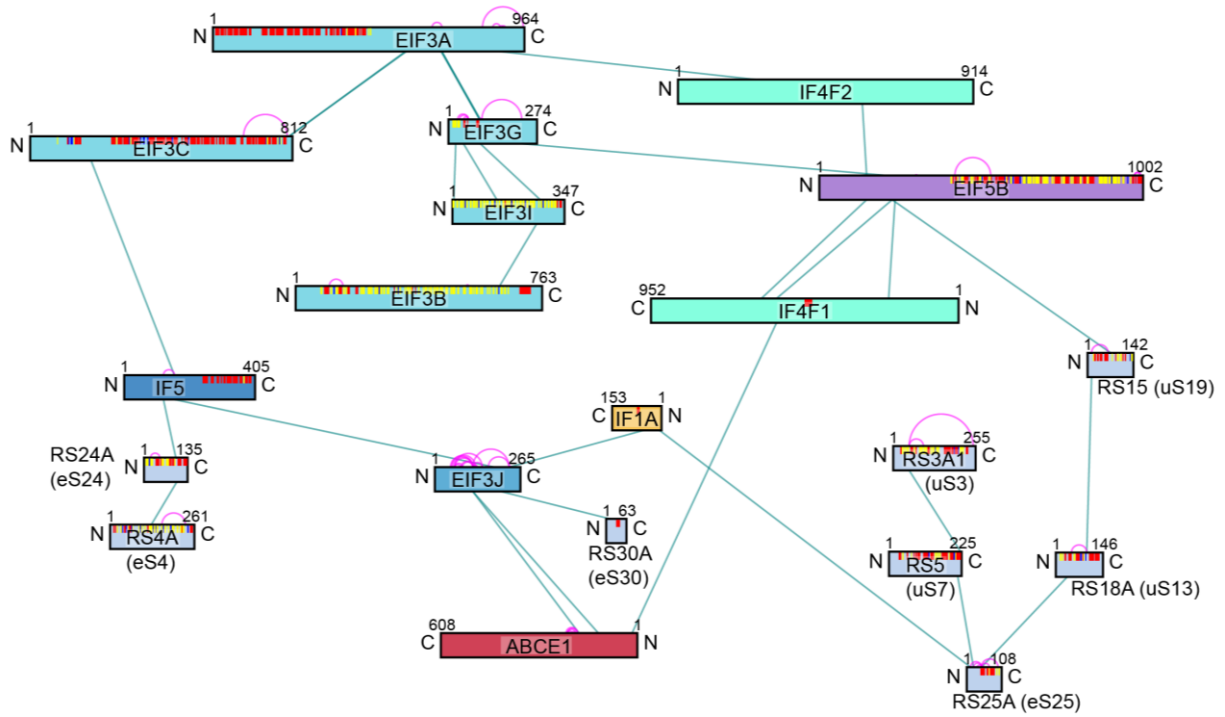

**Appendix Figure S5 - Crosslink derived connectivity network of the yeast ABCE1 43S PIC.**

ABCE1-43S pre-initiation complex was affinity-purified from yeast cell extracts using TAP-tagged Nip1 (eIF3c) protein. Schematic representation of the obtained 43 inter-protein and 74 intra-protein crosslinks (Appendix Table 3) with a focus on initiation factors and ABCE1. Proteins are represented as bars with subunits and secondary structures indicated according to UniProt color scheme. The lengths of protein and crosslinks are scaled to the amino acid sequence.

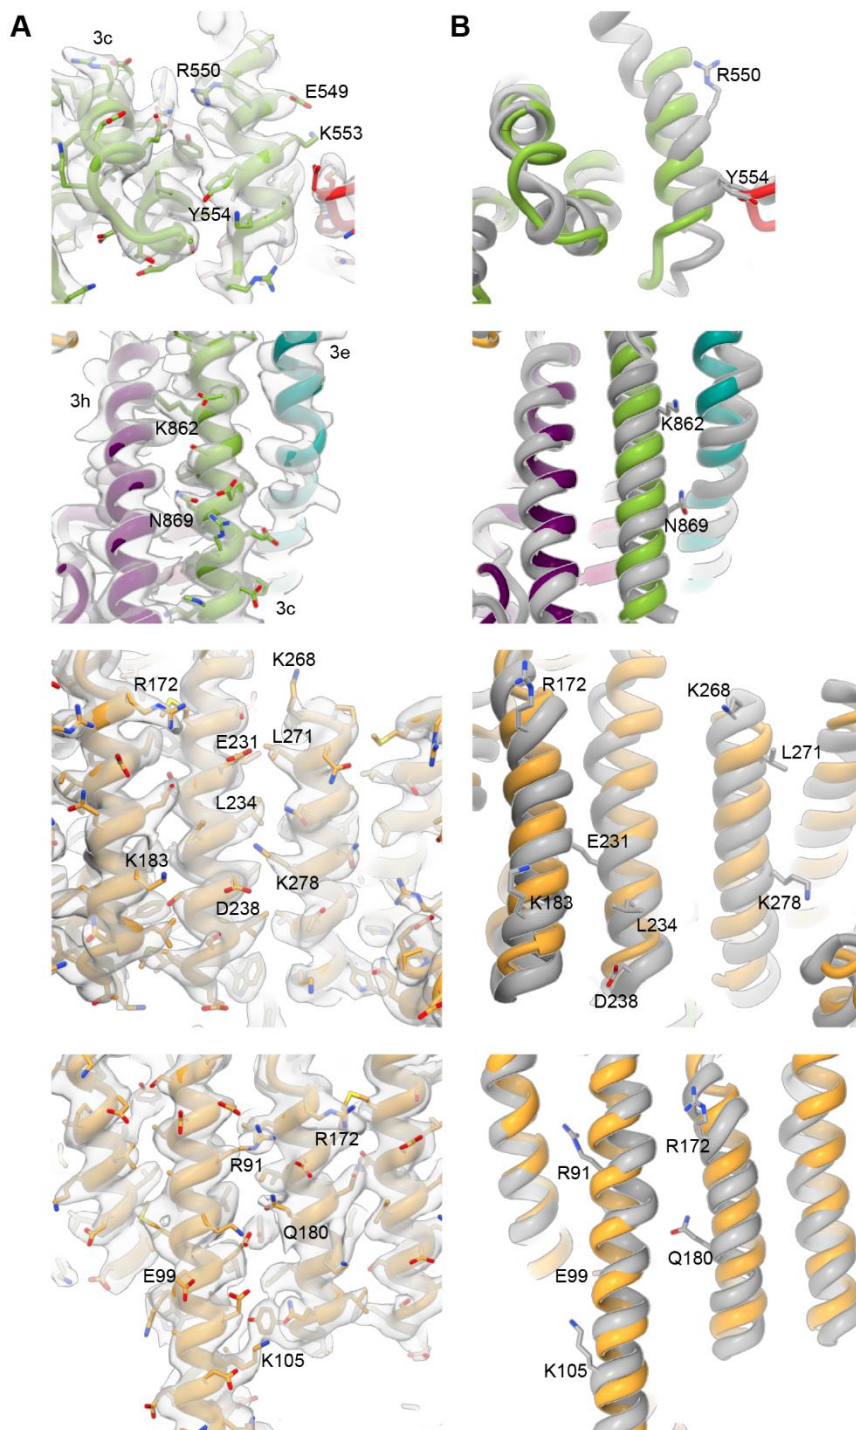

**Appendix Figure S6 - Corrected register shifts in the helices of the PCI-MPN core in the human 43S PIC.**

A Selected sites of the PCI-MPN core shown with cryo-EM density

B Comparison of the new model and the starting model (PDB 5A5T, des Georges *et al.*, 2015) coloured in grey. Same view and colours as in (A). Side chains are labelled to highlight the register shifts.



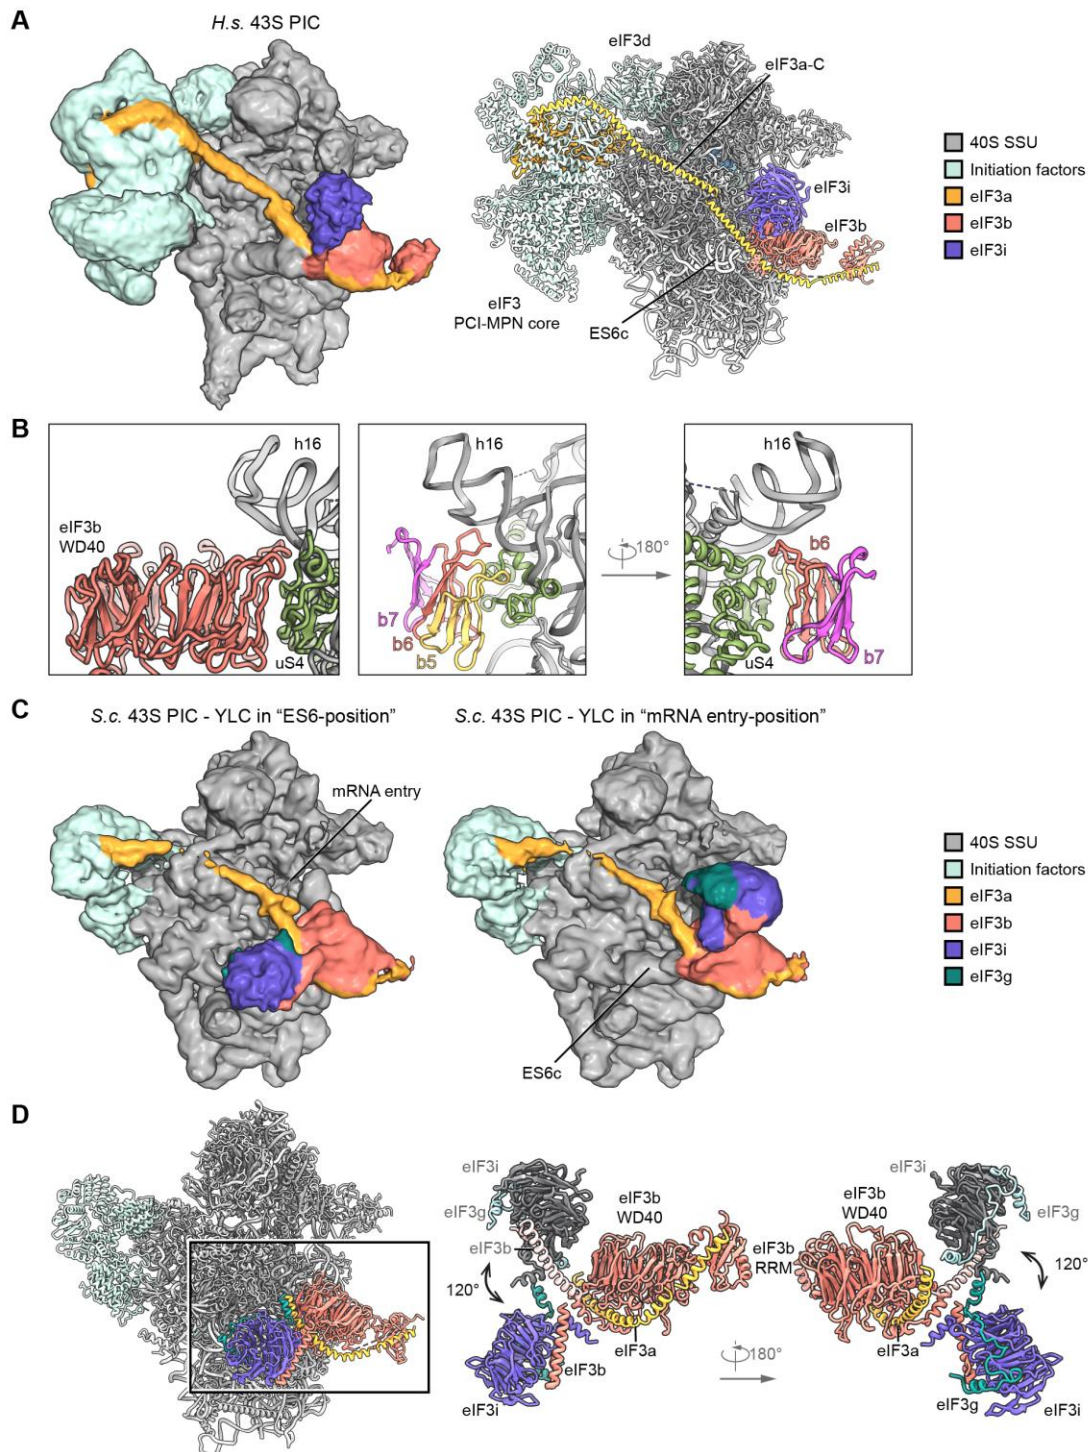

**Appendix Figure S7- Position of the eIF3 YLC and the eIF3a-CTD in yeast and human 43S PICs.**

A Cryo-EM map of the human 43S PIC class obtained after local classification on the YLC (see Appendix Fig S2), low-pass filtered at 6 Å (left). Composite model of the human 43S PIC as in Fig. 2 (right). The view focuses on the mRNA entry side of the 40S, showing the YLC and the rod-like eIF3a density representing its C-terminus spanning from the back side of the 40S to the YLC.

B Interactions of eIF3b with the ribosome; models for eIF3g and eIF3a not shown. Two different views show only WD40 blades (b) 5 to 7 of eIF3b. In  $\beta$ -strand D5 (nomenclature refers to Liu *et al.*, 2014) Arg505, Arg507 and

Leu509 and in  $\beta$ -strand D6 Val558, Glu560 are facing towards uS4. The loop between B5-C5 (485-490) interacts with the rRNA backbone of the h16-h17 junction and uS4 (Tyr 165) and the loop between D5 and A6 (especially Phe510) interacts with Lys121 of uS4. h16 is contacted *via* the loop B6-C6 (res 532-541) *via* backbone interactions.

C Two different states of the yeast YLC obtained after focused classification. In one state (“ES6-position”) the eIF3g-eIF3i module bound to the eIF3b most C-terminal helix is facing towards expansion segment ES6c, in the other state (“mRNA entry-position”) it faces towards the mRNA entry, similar as in the human 43S PIC and as described previously (Erzberger *et al.*, 2014; Llacer *et al.*, 2018). 85% of the particles contained eIF3i in the ES6-position and 15% of particles in the mRNA entry-position (see Appendix Fig S1).

D Molecular model of the yeast 43S PIC with the YLC in (left) and overlay of the two positions. In the overlay the mRNA entry-position eIF3i is colored grey and eIF3g light blue and the eIF3b C-terminal helix white. The loop between the two most C-terminal helices of the eIF3b CTD (Thr697-Asp701) serves as a hinge for rotation.

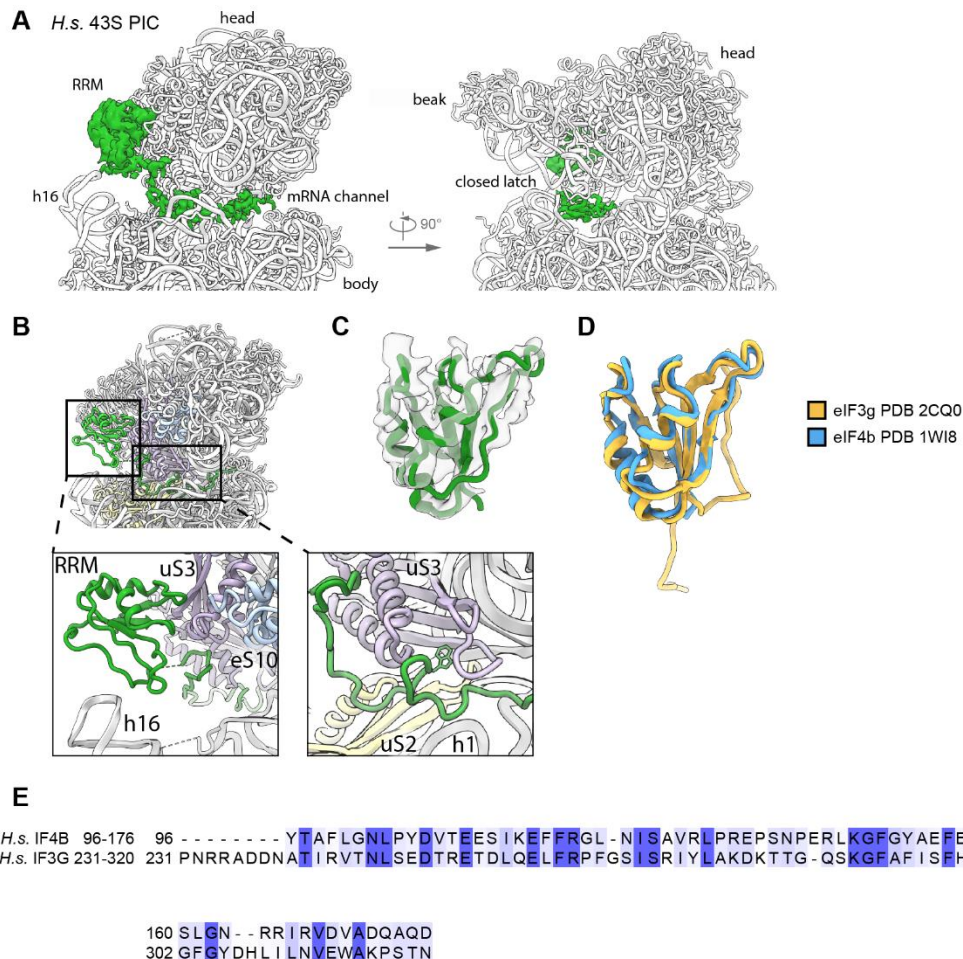

### Appendix Figure S8 - Position of the eIF3g or eIF4b RRM and density in the mRNA channel.

A Zoomed views on the mRNA channel as viewed from the ISS focusing on an extra density (green) on top of rRNA h16 and inside the mRNA channel. The isolated density is low-pass filtered according to local resolution.



B Overview and zoomed views on the poly-alanine model for an RRM on top of h16 and for the density in the mRNA channel in context of the 43S PIC. Interacting r-proteins and rRNA and the clearly visible tryptophan residue interacting with uS3 in the mRNA entry channel are highlighted.

C Model for a typical RRM-fold fitted into the corresponding isolated density.

D Overlay of the RRM of eIF4b and eIF3g.

E Sequence alignment of the RRM of human eIF4b and eIF3g, which shows 21.7/55.4% sequence identity/similarity.

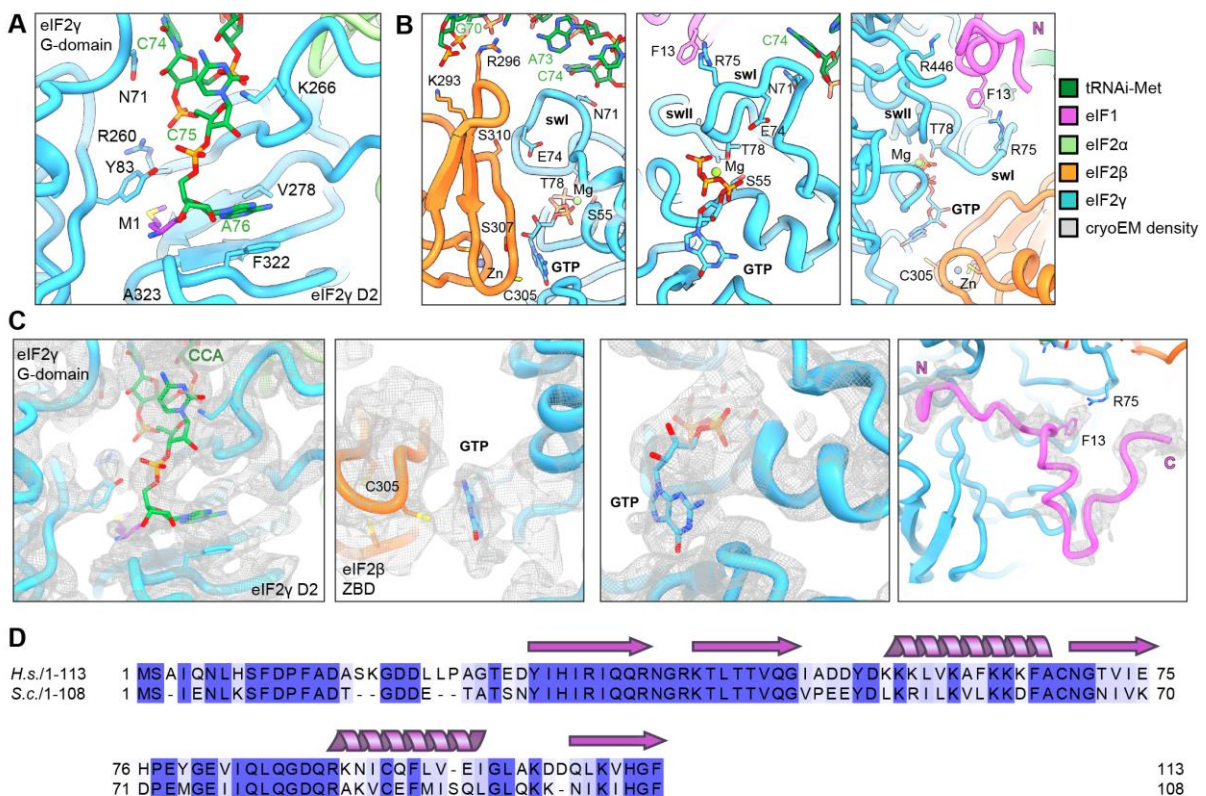

### Appendix Figure S9 - Molecular interactions of the TC in the complete human 43S PIC.

A, B View focusing on the interactions of methionylated tRNA<sub>i</sub> with eIF2γ (A), the ZBD of eIF2β packing upon the nucleotide binding pocket of eIF2γ (B) as shown in Figure 7. Binding to tRNA<sub>i</sub> (left) and the switch loops (sw) of eIF2γ contacting the *de novo* built eIF1 N-terminal tail (middle and right).

C Zoomed views of fits of the TC model into the cryo-EM map. Highlighted are the CCA-end of tRNA<sub>i</sub> bound to eIF2γ, the guanine base lock-up by the eIF2β ZBD, the GTP in the eIF2γ nucleotide binding pocket and the *de novo* built N-terminal tail (res 4-30) of eIF1.

D Sequence alignment between the yeast and human eIF1 shows a sequence identity of 61.1% and a sequence similarity of 87.0% (N-terminus of eIF1 (4-30) shows 55.6/74.1% sequence identity/similarity) indicating a high degree of conservation.

**Appendix Table S1 - Data collection, refinement, and model composition of the yeast initiation complexes.**

|                                                     | <b>S.c. 43S PIC<br/>PDB 6ZCE<br/>EMDB 11160</b> | <b>S.c. 48S IC<br/>PDB 6ZU9<br/>EMDB 11439</b> | <b>S.c. 43S PIC-XL<br/>PDB 7A1G<br/>EMDB 11608</b> |
|-----------------------------------------------------|-------------------------------------------------|------------------------------------------------|----------------------------------------------------|
| <b>Data collection</b>                              |                                                 |                                                |                                                    |
| Voltage (kV)                                        | 300                                             |                                                |                                                    |
| Electron exposure (e <sup>-</sup> /Å <sup>2</sup> ) | 25                                              |                                                | 44.8                                               |
| Defocus range (μm)                                  | -1.1 to -2.3                                    |                                                | -0.5 to -2.5                                       |
| Pixel size (Å)                                      | 1.084                                           |                                                | 1.059                                              |
| Symmetry imposed                                    | C1                                              |                                                |                                                    |
| <b>Refinement</b>                                   |                                                 |                                                |                                                    |
| Particle images (no.)                               | 20,618                                          | 12,937                                         | 25,245                                             |
| Map resolution (Å)                                  | 5.3                                             | 6.2                                            | 3.0                                                |
| FSC threshold                                       | 0.143                                           |                                                |                                                    |
| Map sharpening B factor (Å <sup>2</sup> )           | -48.5                                           | -100                                           | -24                                                |
| <b>Model composition</b>                            |                                                 |                                                |                                                    |
| Correlation coefficient (%; Phenix)                 | 64                                              | 60                                             | 82                                                 |
| Models used (PDB codes)                             | 5NDG, 6FYY, 4U1E, 3BPJ, 6FEC                    | 6TB3, 6FYX, 4U1E                               | 6TB3, 3BPJ                                         |
| Non-hydrogen atoms                                  | 76,380                                          | 78,384                                         | 81,866                                             |
| Protein residues                                    | 8,027                                           | 7,845                                          | 5,612                                              |
| RNA bases                                           | 1,719                                           | 1,852                                          | 1,771                                              |
| <b>R.m.s. deviations</b>                            |                                                 |                                                |                                                    |
| Bond lengths (Å)                                    |                                                 |                                                | 0.009                                              |
| Bond angles (°)                                     |                                                 |                                                | 1.245                                              |
| <b>Validation</b>                                   |                                                 |                                                |                                                    |
| MolProbity score                                    |                                                 |                                                | 1.26                                               |
| Clash score                                         |                                                 |                                                | 4.91                                               |
| Rotamer outliers (%)                                |                                                 |                                                | 0.19                                               |
| <b>Ramachandran plot</b>                            |                                                 |                                                |                                                    |
| Favored (%)                                         |                                                 |                                                | 99.17                                              |
| Allowed (%)                                         |                                                 |                                                | 0.78                                               |
| Disallowed (%)                                      |                                                 |                                                | 0.05                                               |
| <b>Validation RNA</b>                               |                                                 |                                                |                                                    |
| Correct sugar pucker (%)                            |                                                 |                                                | 99                                                 |
| Good backbone conf. (%)                             |                                                 |                                                | 71                                                 |

## Appendix Table S2 - Data collection, refinement, and validation statistics of the human 43S PIC.

Atomic models were built into the best-resolved maps as obtained after local focused refinement or multi-body refinement. Validation statistics are shown for each individual part, as well as for the final composite models. The model for State II includes 40S SSU, eIF1, eIF3 PCI-MPN core, eIF3d, eIF3c-N, eIF3a-C, eIF3b, eIF3i, eIF3j, RRM and ABCE1. The model for State III includes 40S SSU, eIF1, eIF1A, eIF2 $\alpha/\beta/\gamma$ , tRNA<sub>i</sub>, eIF3 PCI-MPN core, eIF3d, eIF3c-N, eIF3a-C, eIF3b, eIF3i, RRM and ABCE1.

| <b>H.s. 43S</b>                                     | <b>40S<br/>eIF1A<br/>eIF3c-N<br/>eIF3d</b>                  | <b>eIF3 PCI-<br/>MPN core<br/>(3a, 3c, 3d-<br/>N, 3e, 3f,<br/>3h, 3k, 3l,<br/>3m)</b> | <b>Ternary<br/>complex<br/>(eIF2<math>\alpha/\beta/\gamma</math>,<br/>tRNA<sub>i</sub>,<br/>eIF1)</b> | <b>ABCE1</b> | <b>composite<br/>model<br/>(state II)<br/>(PDB<br/>6ZVJ,<br/>EMDB<br/>11458)</b> | <b>composite<br/>model<br/>(state III)<br/>(PDB<br/>7A09,<br/>EMDB<br/>11602)</b> |
|-----------------------------------------------------|-------------------------------------------------------------|---------------------------------------------------------------------------------------|-------------------------------------------------------------------------------------------------------|--------------|----------------------------------------------------------------------------------|-----------------------------------------------------------------------------------|
| <b>Data collection</b>                              |                                                             |                                                                                       |                                                                                                       |              |                                                                                  |                                                                                   |
| Voltage (kV)                                        | 300                                                         |                                                                                       |                                                                                                       |              |                                                                                  |                                                                                   |
| Electron exposure (e <sup>-</sup> /Å <sup>2</sup> ) | 48                                                          |                                                                                       |                                                                                                       |              |                                                                                  |                                                                                   |
| Defocus range (μm)                                  | -0.5 to -2.5                                                |                                                                                       |                                                                                                       |              |                                                                                  |                                                                                   |
| Pixel size (Å)                                      | 1.059                                                       |                                                                                       |                                                                                                       |              |                                                                                  |                                                                                   |
| Symmetry imposed                                    | C1                                                          |                                                                                       |                                                                                                       |              |                                                                                  |                                                                                   |
| <b>Refinement</b>                                   |                                                             |                                                                                       |                                                                                                       |              |                                                                                  |                                                                                   |
| Particle images (no.)                               | 23,660                                                      | 25,228                                                                                | 11,032                                                                                                | 13,250       | 5,231                                                                            | 8,712                                                                             |
| Map resolution (Å)                                  | 3.0/3.0<br>(40S<br>body/head)                               | 3.4/3.8<br>(a,c,d,e,f,h,<br>k,l,m)                                                    | 4                                                                                                     | 3.2          | 3.8                                                                              | 3.5                                                                               |
| FSC threshold                                       | 0.143                                                       |                                                                                       |                                                                                                       |              |                                                                                  |                                                                                   |
| Map sharpening B factor (Å <sup>2</sup> )           | -29.98/<br>-35.86                                           | -61.34/<br>89.07                                                                      | -50.55                                                                                                | -45.58       | -36.79                                                                           | -34.39                                                                            |
| <b>Model composition</b>                            |                                                             |                                                                                       |                                                                                                       |              |                                                                                  |                                                                                   |
| Correlation coefficient (%; mask; Phenix)           | 85/84                                                       | 81                                                                                    | 51                                                                                                    | 80           | 69                                                                               | 75                                                                                |
| Starting model (PDB codes)                          | 40S: 6G5H<br>eL41: 6EK0<br>eIF1A:<br>3J81<br>eIF3d:<br>5K4B | 5A5T                                                                                  | tRNA:<br>6FEC<br>eIF2 $\beta$ :<br>6GSM<br>eIF2 $\alpha,\gamma$ :<br>6O85<br>eIF1:<br>6GSM            | 5LL6         |                                                                                  |                                                                                   |
| Non-hydrogen atoms                                  | 50,220/<br>27,787                                           | 25,291                                                                                | 7,889                                                                                                 | 4,619        | 115,031                                                                          | 122,211                                                                           |
| Protein residues                                    | 3,043/<br>2,239                                             | 3,104                                                                                 | 973                                                                                                   | 576          | 10,127                                                                           | 10,954                                                                            |
| RNA bases                                           | 1208/<br>464                                                | 0                                                                                     | 75                                                                                                    | 0            | 1,720                                                                            | 1,796                                                                             |
| <b>R.m.s. deviations</b>                            |                                                             |                                                                                       |                                                                                                       |              |                                                                                  |                                                                                   |
| Bond lengths (Å)                                    | 0.017/0.024                                                 | 0.016                                                                                 | 0.013                                                                                                 | 0.017        | 0.010                                                                            | 0.010                                                                             |
| Bond angles (°)                                     | 1.425/1.757                                                 | 1.587                                                                                 | 1.578                                                                                                 | 1.558        | 1.337                                                                            | 1.203                                                                             |



|                          |             |       |       |       |       |       |
|--------------------------|-------------|-------|-------|-------|-------|-------|
| <b>Validation</b>        |             |       |       |       |       |       |
| MolProbity score         | 1.79/2.05   | 1.5   | 1.93  | 2.21  | 1.4   | 1.98  |
| Clash score              | 2.82/4.36   | 6.52  | 7.9   | 6.45  | 5.45  | 8.57  |
| Rotamer outliers (%)     | 8.9/12.64   | 1.53  | 3.83  | 13.44 | 1.39  | 0.02  |
| <b>Ramachandran plot</b> |             |       |       |       |       |       |
| Favored (%)              | 99.63/99.18 | 99.74 | 97.74 | 99.48 | 99.76 | 90.96 |
| Allowed (%)              | 0.37/0.77   | 0.26  | 1.54  | 0.52  | 0.24  | 8.98  |
| Disallowed (%)           | 0/0.05      | 0     | 0.71  | 0     | 0     | 0.06  |
| <b>Validation RNA</b>    |             |       |       |       |       |       |
| Correct sugar pucker (%) | 99.17/98.71 | -     | 100   | -     | 100   | 100   |
| Good backbone conf. (%)  | 73.43/75    | -     | 69.33 | -     | 70    | 70    |

### Appendix Table S3 - Crosslinks identified on a yeast ABCE1-43S PIC.

ABCE1-bound 43S PIC was affinity-purified from yeast cell extracts using TAP-tagged Nip1 (eIF3c) protein and crosslinked with BS2G. 43 inter-protein (dark green) and 74 intra-protein (light green) crosslinks were obtained from the analysis. The crosslinks are listed according to the Id.Score (xQuest identification score).

| No | Topology                             | Protein1              | Protein2              | AbsPos1 | AbsPos2 | Mz      | z | Error | Id.Score |
|----|--------------------------------------|-----------------------|-----------------------|---------|---------|---------|---|-------|----------|
| 1  | TLVNKSTGLK-VAKSNR-a5-b3              | sp P33442 RS3A1_YEAST | sp P26783 RS5_YEAST   | 50      | 222     | 610.686 | 3 | -1.1  | 42.07    |
| 2  | NKDDLEKISK-IAKER-a7-b3               | sp P38249 EIF3A_YEAST | sp P32497 EIF3C_YEAST | 596     | 802     | 476.015 | 4 | 0.1   | 40.46    |
| 3  | ALQKEQEEQALK-STALKILAGK-a4-b5        | sp Q05775 EIF3J_YEAST | sp Q03195 RLI1_YEAST  | 118     | 121     | 628.607 | 4 | 0.7   | 39.23    |
| 4  | TGPKALPDAVTIIEPK-VKQLENVSSNIVK-a4-b2 | sp P05750 RS3_YEAST   | sp P38701 RS20_YEAST  | 200     | 32      | 801.455 | 4 | 1.2   | 39.09    |
| 5  | DDLEKISK-IAKER-a5-b3                 | sp P38249 EIF3A_YEAST | sp P32497 EIF3C_YEAST | 596     | 802     | 553.637 | 3 | -0.9  | 37.91    |
| 6  | ENKVSPADAAK-VIKVLGR-a3-b3            | sp P39938 RS26A_YEAST | sp Q3E7X9 RS28A_YEAST | 108     | 14      | 503.041 | 4 | 0.5   | 37.53    |
| 7  | GISFKLQEEERER-SFKEPR-a5-b3           | sp P02407 RS17A_YEAST | sp P32905 RSSA1_YEAST | 72      | 116     | 496.658 | 5 | -0.3  | 35.5     |
| 8  | DSATHELTKVSEPIHK-VHKSVAER-a9-b3      | sp P40217 EIF3I_YEAST | sp Q04067 EIF3G_YEAST | 138     | 47      | 589.106 | 5 | -1.4  | 34.7     |
| 9  | GISFKLQEEER-SFKEPR-a5-b3             | sp P02407 RS17A_YEAST | sp P32905 RSSA1_YEAST | 72      | 116     | 732.043 | 3 | 0.1   | 34.7     |
| 10 | NKSELESR-IQKEK-a2-b3                 | sp P38249 EIF3A_YEAST | sp Q04067 EIF3G_YEAST | 709     | 97      | 568.305 | 3 | 1.2   | 34.63    |
| 11 | ISKIVDER-IAKER-a3-b3                 | sp P38249 EIF3A_YEAST | sp P32497 EIF3C_YEAST | 599     | 802     | 557.653 | 3 | -1    | 34.28    |
| 12 | EKVVEEQEQQQIHK-VPTKTEVIIR-a2-b5      | sp P38701 RS20_YEAST  | sp P05750 RS3_YEAST   | 8       | 45      | 809.941 | 4 | 1.1   | 34.14    |
| 13 | ANDIGFHKYR-ITLTSTKVK-a8-b7           | sp P41058 RS29B_YEAST | sp P38701 RS20_YEAST  | 54      | 30      | 577.319 | 4 | 1.3   | 33.77    |
| 14 | QTVATLNLVIKDK-AGKVK-a11-b3           | sp Q05775 EIF3J_YEAST | sp POCX33 RS30A_YEAST | 205     | 13      | 510.808 | 4 | 1.1   | 33.54    |
| 15 | ALQKEQEEQALK-AIKGPVQK-a4-b3          | sp Q05775 EIF3J_YEAST | sp Q03195 RLI1_YEAST  | 118     | 181     | 588.331 | 4 | 0.8   | 31.95    |
| 16 | LTGDDQKFGVPVR-KAFTSYDR-a7-b1         | sp P38011 GBLP_YEAST  | sp POCX51 RS16A_YEAST | 53      | 107     | 629.322 | 4 | 0.5   | 31.91    |
| 17 | LAAPENKPPAPVRTHMR-EKAKR-a8-b4        | sp Q01855 RS15_YEAST  | sp P39730 IF2P_YEAST  | 72      | 226     | 881.813 | 3 | 3.2   | 31.89    |

|    |                                                    |                           |                           |     |     |             |   |          |           |
|----|----------------------------------------------------|---------------------------|---------------------------|-----|-----|-------------|---|----------|-----------|
| 18 | KVQLGK-VEKASR-a1-b3                                | sp POCX35 RS4<br>A_YEAST  | sp POCX31 RS2<br>4A_YEAST | 128 | 102 | 364.<br>968 | 4 | -<br>0.7 | 31.8<br>4 |
| 19 | EFIILGGGQEAQDVTTTSANEGK-<br>HKVEHGK-a12-b2         | sp P40217 EIF31<br>_YEAST | sp P06103 EIF3<br>B_YEAST | 261 | 632 | 865.<br>188 | 4 | 1.2      | 31.7<br>3 |
| 20 | AVLKFAAHTGATPIAGR-<br>KDQYVPEVSALDLSR-a4-b1        | sp P32905 RSSA<br>1_YEAST | sp P02407 RS17<br>A_YEAST | 88  | 81  | 699.<br>979 | 5 | 0.7      | 31.2<br>1 |
| 21 | LVEGLANDPENKVPLIK-<br>VDAEGKVTK-a12-b6             | sp P48589 RS12<br>_YEAST  | sp P05759 RS31<br>_YEAST  | 85  | 113 | 723.<br>401 | 4 | 0.5      | 31.1<br>3 |
| 22 | AAAAAALAGGK-NTKGGK-a3-b3                           | sp Q3E792 RS2<br>5A_YEAST | sp P38912 IF1A<br>_YEAST  | 12  | 7   | 566.<br>988 | 3 | -<br>1.1 | 30.5<br>1 |
| 23 | NKSELESR-EKASLTK-a2-b2                             | sp P38249 EIF3<br>A_YEAST | sp Q04067 EIF3<br>G_YEAST | 709 | 99  | 611.<br>991 | 3 | 0.6      | 30.4<br>8 |
| 24 | AAAAALAGGK-KKDELER-a9-b1                           | sp Q3E792 RS2<br>5A_YEAST | sp P26783 RS5_<br>YEAST   | 21  | 213 | 468.<br>265 | 4 | -<br>1.3 | 30.0<br>6 |
| 25 | TGPKALPDAVTHIEPEKEEPIAPSVK-<br>VKQLENVSSNIVK-a4-b2 | sp P05750 RS3_<br>YEAST   | sp P38701 RS20<br>_YEAST  | 200 | 32  | 879.<br>894 | 5 | 2.3      | 29.6<br>5 |
| 26 | YIDLEAPVQIVKR-VTPTKTEVIIR-a12-<br>b5               | sp P38701 RS20<br>_YEAST  | sp P05750 RS3_<br>YEAST   | 101 | 45  | 724.<br>67  | 4 | 0.7      | 29.5<br>8 |
| 27 | DVTTTSANEGKFEAR-EKASLTK-a11-<br>b2                 | sp P40217 EIF31<br>_YEAST | sp Q04067 EIF3<br>G_YEAST | 272 | 99  | 833.<br>087 | 3 | 0.9      | 29.2<br>1 |
| 28 | REDDKPK-EKAKR-a5-b4                                | sp P39935 IF4F<br>1_YEAST | sp P39730 IF2P<br>_YEAST  | 564 | 226 | 538.<br>627 | 3 | 2.7      | 29        |
| 29 | GGTATGGAGK-VEASCFDGNKR-<br>a10-b10                 | sp Q05775 EIF3<br>J_YEAST | sp P38912 IF1A<br>_YEAST  | 230 | 56  | 761.<br>367 | 3 | 0.6      | 28.4<br>2 |
| 30 | AAAEKSQKSK-KMKSLLNK-a8-b3                          | sp P39730 IF2P<br>_YEAST  | sp P39935 IF4F<br>1_YEAST | 147 | 611 | 702.<br>066 | 3 | 0.7      | 28.2      |
| 31 | AAAEKSQKSK-KMKSLLNK-a8-b3                          | sp P39730 IF2P<br>_YEAST  | sp P39936 IF4F<br>2_YEAST | 147 | 571 | 702.<br>066 | 3 | 0.7      | 28.2      |
| 32 | QVIIAEVSKNK-IQKEK-a9-b3                            | sp P38249 EIF3<br>A_YEAST | sp Q04067 EIF3<br>G_YEAST | 707 | 97  | 493.<br>039 | 4 | 0        | 28.1<br>9 |
| 33 | AIKLTGHERPLTQVK-SIITYKIEDGVK-<br>a3-b6             | sp P40217 EIF31<br>_YEAST | sp Q04067 EIF3<br>G_YEAST | 5   | 23  | 631.<br>161 | 5 | -<br>0.2 | 27.5<br>1 |
| 34 | KAATASANVR-NKAVAR-a1-b2                            | sp P38431 IF5_<br>YEAST   | sp P32497 EIF3<br>C_YEAST | 156 | 189 | 581.<br>326 | 3 | -<br>2.5 | 26.7<br>3 |
| 35 | AEGKLLTRK-KAALEKK-a4-b1                            | sp P39730 IF2P<br>_YEAST  | sp P39935 IF4F<br>1_YEAST | 235 | 217 | 633.<br>386 | 3 | -<br>0.1 | 26.4<br>2 |
| 36 | AQHAVILDQEKYDR-<br>IVYALTTIKGVGR-a11-b9            | sp Q3E792 RS2<br>5A_YEAST | sp POCX55 RS1<br>8A_YEAST | 46  | 36  | 793.<br>683 | 4 | -<br>2.1 | 26.1<br>4 |
| 37 | AGNREPPSTPSTLPKATVSPDK-<br>KNGLISETEK-a15-b1       | sp P38249 EIF3<br>A_YEAST | sp P39936 IF4F<br>2_YEAST | 889 | 243 | 693.<br>563 | 5 | -2       | 25.4<br>9 |
| 38 | QNDITDGKDYHTLANNVESK-<br>VFKTHSYR-a8-b3            | sp POCX55 RS1<br>8A_YEAST | sp Q01855 RS1<br>5_YEAST  | 96  | 13  | 679.<br>733 | 5 | 1.5      | 25.1      |
| 39 | IAIVSADKCKPK-EDDKPK-a10-b4                         | sp Q03195 RLI1<br>_YEAST  | sp P39935 IF4F<br>1_YEAST | 17  | 564 | 539.<br>787 | 4 | -<br>1.9 | 24.7<br>7 |
| 40 | VSVVRNKETGK-LANEEKMK-a7-b6                         | sp Q04067 EIF3<br>G_YEAST | sp P39730 IF2P<br>_YEAST  | 227 | 210 | 569.<br>308 | 4 | -1       | 23.0<br>8 |
| 41 | DVAKPMSIESIR-KKAATASANVR-a4-<br>b2                 | sp Q05775 EIF3<br>J_YEAST | sp P38431 IF5_<br>YEAST   | 186 | 156 | 640.<br>102 | 4 | 2.2      | 22.9<br>2 |
| 42 | DVLDELKNYISKR-EIVKNTSSKK-a7-<br>b4                 | sp P20459 IF2A<br>_YEAST  | sp P39015 STM<br>1_YEAST  | 170 | 27  | 485.<br>598 | 6 | -4       | 22.7<br>3 |
| 43 | YGLAEKVEK-DCKACGK-a6-b3                            | sp POCX31 RS2<br>4A_YEAST | sp P38431 IF5_<br>YEAST   | 99  | 122 | 657.<br>319 | 3 | 2.6      | 22.6<br>1 |
| 44 | VGELLKLR-SPEDVKR-a6-b6                             | sp Q03195 RLI1<br>_YEAST  | sp Q03195 RLI1<br>_YEAST  | 192 | 203 | 464.<br>018 | 4 | -<br>0.9 | 43.0<br>8 |
| 45 | ILQLENVLKR-VGELLKLR-a9-b6                          | sp Q03195 RLI1<br>_YEAST  | sp Q03195 RLI1<br>_YEAST  | 216 | 192 | 562.<br>85  | 4 | 0.4      | 42.5      |
| 46 | FNVVKVSAAAGK-NAGLGFKTPK-a5-<br>b7                  | sp POCX48 RS1<br>1B_YEAST | sp POCX48 RS1<br>1B_YEAST | 141 | 43  | 580.<br>329 | 4 | 1.8      | 41.3<br>7 |
| 47 | NTEEKGWVPVK-LVKAGK-a5-b3                           | sp P25443 RS2_<br>YEAST   | sp P25443 RS2_<br>YEAST   | 33  | 46  | 700.<br>057 | 3 | 1        | 41.0<br>6 |
| 48 | AQHAVILDQEKYDR-LKIGGSLAR-<br>a11-b2                | sp Q3E792 RS2<br>5A_YEAST | sp Q3E792 RS2<br>5A_YEAST | 46  | 70  | 539.<br>897 | 5 | 0.5      | 40.7<br>2 |

|    |                                          |                       |                       |     |     |         |   |      |       |
|----|------------------------------------------|-----------------------|-----------------------|-----|-----|---------|---|------|-------|
| 49 | GPVQKVGELLK-ILQLENVLKR-a5-b9             | sp Q03195 RLI1_YEAST  | sp Q03195 RLI1_YEAST  | 186 | 216 | 622.878 | 4 | 1.4  | 39.24 |
| 50 | SDWLLLLK-SIDTLKDK-a7-b6                  | sp P39730 IF2P_YEAST  | sp P39730 IF2P_YEAST  | 993 | 976 | 505.037 | 4 | 0.7  | 38.85 |
| 51 | AQHAVILDQEKYDR-AAAALAGGKK-a11-b9         | sp Q3E792 RS25A_YEAST | sp Q3E792 RS25A_YEAST | 46  | 21  | 528.486 | 5 | 0.4  | 38.73 |
| 52 | EKVVEEQEQQQQI-K-YIDLEAPVQIVKR-a2-b12     | sp P38701 RS20_YEAST  | sp P38701 RS20_YEAST  | 8   | 101 | 881.722 | 4 | 0.5  | 38.37 |
| 53 | ASLTKTGLQCR-IQKEK-a5-b3                  | sp Q04067 EIF3G_YEAST | sp Q04067 EIF3G_YEAST | 104 | 97  | 659.027 | 3 | 0.9  | 38.32 |
| 54 | ALTSLSFKAGK-SFHGKR-a8-b5                 | sp P06103 EIF3B_YEAST | sp P06103 EIF3B_YEAST | 105 | 147 | 488.021 | 4 | -1.2 | 38.05 |
| 55 | LSSVESVIEQIVKYAR-KGLTPSIGVLLR-a12-b1     | sp P05756 RS13_YEAST  | sp P05756 RS13_YEAST  | 39  | 43  | 800.459 | 4 | 0.6  | 37.83 |
| 56 | RKEEIANAER-LAKGGR-a2-b3                  | sp P38249 EIF3A_YEAST | sp P38249 EIF3A_YEAST | 835 | 961 | 478.765 | 4 | -0.6 | 37.72 |
| 57 | VQTKLTR-ELEKK-a4-b4                      | sp P26786 RS7A_YEAST  | sp P26786 RS7A_YEAST  | 76  | 83  | 529.642 | 3 | -0.9 | 37.4  |
| 58 | KLDYVLALK-VGVLSDEKK-a1-b8                | sp P05755 RS9B_YEAST  | sp P05755 RS9B_YEAST  | 92  | 90  | 533.811 | 4 | 0    | 37.27 |
| 59 | ALQKEQEEQALK-KGKESSADR-a4-b3             | sp Q05775 EIF3J_YEAST | sp Q05775 EIF3J_YEAST | 118 | 62  | 622.573 | 4 | -0.2 | 37.1  |
| 60 | ILQLENVLKR-SPEDVKR-a9-b6                 | sp Q03195 RLI1_YEAST  | sp Q03195 RLI1_YEAST  | 216 | 203 | 538.56  | 4 | 0.6  | 37.08 |
| 61 | APFVVALNKIDR-TKLLDK-a9-b2                | sp P39730 IF2P_YEAST  | sp P39730 IF2P_YEAST  | 531 | 420 | 539.568 | 4 | 0    | 36.93 |
| 62 | DIEKLSGGELQR-ILQLENVLKR-a4-b9            | sp Q03195 RLI1_YEAST  | sp Q03195 RLI1_YEAST  | 221 | 216 | 889.17  | 3 | 2.3  | 36.86 |
| 63 | KAPFVVALNKIDR-TKLLDK-a10-b2              | sp P39730 IF2P_YEAST  | sp P39730 IF2P_YEAST  | 531 | 420 | 571.592 | 4 | 0.4  | 36.58 |
| 64 | LNNVFVIGEQGKPYISLPK-VNDTVKIDLASGK-a12-b6 | sp POCX35 RS4A_YEAST  | sp POCX35 RS4A_YEAST  | 233 | 161 | 893.492 | 4 | 0.8  | 36.39 |
| 65 | VCEFMISQLGLQKK-NIKIHGF-a13-b3            | sp P32911 SUI1_YEAST  | sp P32911 SUI1_YEAST  | 100 | 104 | 651.848 | 4 | -0.2 | 36.2  |
| 66 | AQHAVILDQEKYDR-AAKAAAALAGGK-a11-b3       | sp Q3E792 RS25A_YEAST | sp Q3E792 RS25A_YEAST | 46  | 12  | 556.9   | 5 | -0.5 | 36.03 |
| 67 | YGSEKSPAGPSAVTAR-IEDGVKYK-a5-b6          | sp Q04067 EIF3G_YEAST | sp Q04067 EIF3G_YEAST | 62  | 29  | 671.092 | 4 | 0.5  | 35.94 |
| 68 | ALQKEQEEQALK-GKESSADR-a4-b2              | sp Q05775 EIF3J_YEAST | sp Q05775 EIF3J_YEAST | 118 | 62  | 590.549 | 4 | -0.9 | 35.75 |
| 69 | AQHAVILDQEKYDR-ILKEVPTYR-a11-b3          | sp Q3E792 RS25A_YEAST | sp Q3E792 RS25A_YEAST | 46  | 52  | 580.711 | 5 | -1.9 | 35.63 |
| 70 | KAATASANVR-DCKACGK-a1-b3                 | sp P38431 IF5_YEAST   | sp P38431 IF5_YEAST   | 156 | 122 | 641.312 | 3 | -1.3 | 35.61 |
| 71 | YGSEKSPAGPSAVTAR-VHKSVAER-a5-b3          | sp Q04067 EIF3G_YEAST | sp Q04067 EIF3G_YEAST | 62  | 47  | 664.594 | 4 | 1.8  | 35.58 |
| 72 | NVKEEETVAK-SKNAER-a3-b2                  | sp POCX39 RS8A_YEAST  | sp POCX39 RS8A_YEAST  | 128 | 137 | 649.332 | 3 | -0.9 | 35.57 |
| 73 | FYAPETKEK-TDVIKR-a7-b5                   | sp P06103 EIF3B_YEAST | sp P06103 EIF3B_YEAST | 529 | 536 | 647.011 | 3 | 0    | 35.56 |
| 74 | DIEKLSGGELQR-GPVQKVGELLK-a4-b5           | sp Q03195 RLI1_YEAST  | sp Q03195 RLI1_YEAST  | 221 | 186 | 869.818 | 3 | 1.3  | 35.54 |
| 75 | ALLDIDTLDEKTR-GKESSADR-a11-b2            | sp Q05775 EIF3J_YEAST | sp Q05775 EIF3J_YEAST | 79  | 62  | 612.562 | 4 | 0    | 35.39 |
| 76 | AAKLAAPENEKPPAVR-VFKTHSYR-a3-b3          | sp Q01855 RS15_YEAST  | sp Q01855 RS15_YEAST  | 64  | 13  | 466.589 | 6 | -1.7 | 35.26 |
| 77 | TGPKALPDAVTIIEPK-DPAKSR-a4-b4            | sp P05750 RS3_YEAST   | sp P05750 RS3_YEAST   | 200 | 194 | 605.336 | 4 | -2.1 | 34.52 |
| 78 | ALQKEQEEQALK-KEQPKK-a4-b5                | sp Q05775 EIF3J_YEAST | sp Q05775 EIF3J_YEAST | 118 | 56  | 567.563 | 4 | 1.1  | 34.31 |
| 79 | GGTATGGAGKK-GKTNLGGAFK-a10-b2            | sp Q05775 EIF3J_YEAST | sp Q05775 EIF3J_YEAST | 230 | 236 | 664.688 | 3 | -1.7 | 34.19 |

|     |                                          |                       |                       |     |     |         |   |      |       |
|-----|------------------------------------------|-----------------------|-----------------------|-----|-----|---------|---|------|-------|
| 80  | TTQENASEAIKSDSK-KDSEVVPDDELK-a11-b1      | sp P39730 IF2P_YEAST  | sp P39730 IF2P_YEAST  | 298 | 303 | 770.123 | 4 | 1.1  | 34.13 |
| 81  | ASLTKTGLQCR-NKETGK-a5-b2                 | sp Q04067 EIF3G_YEAST | sp Q04067 EIF3G_YEAST | 104 | 227 | 669.351 | 3 | 1.1  | 34.09 |
| 82  | ALQKEQEEQALK-ELIKK-a4-b4                 | sp Q05775 EIF3J_YEAST | sp Q05775 EIF3J_YEAST | 118 | 86  | 714.067 | 3 | -0.2 | 33.94 |
| 83  | YIDLEAPVQIVKR-VLKISTR-a12-b3             | sp P38701 RS20_YEAST  | sp P38701 RS20_YEAST  | 101 | 64  | 614.614 | 4 | 1    | 33.77 |
| 84  | KQFVVDVLHPNR-LAEVYKAEK-a1-b6             | sp POCX31 RS24A_YEAST | sp POCX31 RS24A_YEAST | 21  | 49  | 650.107 | 4 | -1   | 33.63 |
| 85  | RPAFTKDTPIETHPLFNAETK-ALQKEQEEQALK-a6-b4 | sp Q05775 EIF3J_YEAST | sp Q05775 EIF3J_YEAST | 132 | 118 | 654.677 | 6 | 0.9  | 33.38 |
| 86  | ALLDIDTLDEKTRK-ELIKK-a11-b4              | sp Q05775 EIF3J_YEAST | sp Q05775 EIF3J_YEAST | 79  | 86  | 786.117 | 3 | 0.3  | 33.35 |
| 87  | ATVSPDKAK-LDMIAQQR-a7-b7                 | sp P38249 EIF3A_YEAST | sp P38249 EIF3A_YEAST | 896 | 905 | 529.288 | 4 | 0.7  | 33.28 |
| 88  | AQHAVILDQEKYDR-SMKDR-a11-b3              | sp Q3E792 RS25A_YEAST | sp Q3E792 RS25A_YEAST | 46  | 33  | 605.053 | 4 | -0.4 | 32.77 |
| 89  | GKESSADR-ELIKK-a2-b4                     | sp Q05775 EIF3J_YEAST | sp Q05775 EIF3J_YEAST | 62  | 86  | 525.618 | 3 | 0.4  | 32.67 |
| 90  | SLEHYDKLSFQGGPETLR-LNKEYK-a7-b3          | sp P32497 EIF3C_YEAST | sp P32497 EIF3C_YEAST | 661 | 796 | 752.386 | 4 | -0.9 | 32.18 |
| 91  | NPPDSVSGSKK-KAATASANVR-a10-b1            | sp P38431 IF5_YEAST   | sp P38431 IF5_YEAST   | 152 | 156 | 550.54  | 4 | -0.3 | 31.91 |
| 92  | EKVVEEQEQQQIIK-VLKISTR-a2-b3             | sp P38701 RS20_YEAST  | sp P38701 RS20_YEAST  | 8   | 64  | 699.884 | 4 | 0    | 31.42 |
| 93  | MITEVNAKGHVYIDPNEAK-NKSELESR-a8-b2       | sp P38249 EIF3A_YEAST | sp P38249 EIF3A_YEAST | 679 | 709 | 797.399 | 4 | 0.1  | 31.28 |
| 94  | ALQKEQEEQALK-KPAPKPK-a4-b5               | sp Q05775 EIF3J_YEAST | sp Q05775 EIF3J_YEAST | 118 | 49  | 569.573 | 4 | 0.4  | 31.24 |
| 95  | EQEEQALKRPAFTK-ALQKEQEEQALK-a8-b4        | sp Q05775 EIF3J_YEAST | sp Q05775 EIF3J_YEAST | 126 | 118 | 637.737 | 5 | 0.8  | 30.87 |
| 96  | YGSEKSPAGPSAVTAR-ITQKVK-a5-b4            | sp Q04067 EIF3G_YEAST | sp Q04067 EIF3G_YEAST | 62  | 35  | 612.331 | 4 | 1.8  | 30.64 |
| 97  | VDEVQGNLLTNFHGMDFTTDK-TLVNKSTGLK-a7-b5   | sp P33442 RS3A1_YEAST | sp P33442 RS3A1_YEAST | 94  | 50  | 916.969 | 4 | -0.5 | 30.62 |
| 98  | DTPIETHPLFNAETKR-GKESSADR-a15-b2         | sp Q05775 EIF3J_YEAST | sp Q05775 EIF3J_YEAST | 147 | 62  | 704.099 | 4 | 0.7  | 30.5  |
| 99  | LRVDEVQGNLLTNFHGMDFTTDK-TLVNKSTGLK-a9-b5 | sp P33442 RS3A1_YEAST | sp P33442 RS3A1_YEAST | 94  | 50  | 787.612 | 5 | -2.7 | 30.1  |
| 100 | GFLFVECGSMNDAKK-IKSFHGK-a14-b3           | sp P06103 EIF3B_YEAST | sp P06103 EIF3B_YEAST | 138 | 142 | 682.596 | 4 | -1.7 | 29.94 |
| 101 | LKVVFGE-SIDTLKDK-a2-b6                   | sp P39730 IF2P_YEAST  | sp P39730 IF2P_YEAST  | 996 | 976 | 640.363 | 3 | -0.1 | 29.77 |
| 102 | DTPIETHPLFNAETKR-ALQKEQEEQALK-a15-b4     | sp Q05775 EIF3J_YEAST | sp Q05775 EIF3J_YEAST | 147 | 118 | 845.435 | 4 | -0.8 | 29.56 |
| 103 | AGNREPPSTPSTLPKATVSPDK-AKLDMIAQK-a15-b2  | sp P38249 EIF3A_YEAST | sp P38249 EIF3A_YEAST | 889 | 898 | 673.359 | 5 | 0    | 29.43 |
| 104 | DLSEASVYPEYALPKTYNK-ENKVSPADAAK-a15-b3   | sp P39938 RS26A_YEAST | sp P39938 RS26A_YEAST | 66  | 108 | 853.926 | 4 | 0.2  | 29.34 |
| 105 | ALQKEQEEQALK-TRKELIK-a4-b3               | sp Q05775 EIF3J_YEAST | sp Q05775 EIF3J_YEAST | 118 | 82  | 480.273 | 5 | -0.1 | 29.06 |
| 106 | AGNREPPSTPSTLPKATVSPDK-KSTPYSFR-a15-b1   | sp P38249 EIF3A_YEAST | sp P38249 EIF3A_YEAST | 889 | 867 | 666.946 | 5 | 0.9  | 28.39 |
| 107 | AQHAVILDQEKYDR-HSKQAIYTR-a11-b3          | sp Q3E792 RS25A_YEAST | sp Q3E792 RS25A_YEAST | 46  | 97  | 577.7   | 5 | -0.9 | 28.21 |
| 108 | EPPSTPSTLPKATVSPDK-KSTPYSFR-a11-b1       | sp P38249 EIF3A_YEAST | sp P38249 EIF3A_YEAST | 889 | 867 | 733.879 | 4 | -0.7 | 25.78 |
| 109 | EQEEQALKRPAFTK-KEQPK-a8-b1               | sp Q05775 EIF3J_YEAST | sp Q05775 EIF3J_YEAST | 126 | 52  | 600.568 | 4 | -2.8 | 25.66 |
| 110 | AASAKIESSVESQFSAGR-NVKEEETVAK-a5-b3      | sp POCX39 RS8A_YEAST  | sp POCX39 RS8A_YEAST  | 151 | 128 | 767.388 | 4 | 1.4  | 25.61 |

|     |                                          |                        |                        |     |     |         |   |      |       |
|-----|------------------------------------------|------------------------|------------------------|-----|-----|---------|---|------|-------|
| 111 | VVAQVEDAVNNTQQADLKNK-NKAVARAYNTTK-a18-b2 | sp P32497 EIF3 C_YEAST | sp P32497 EIF3 C_YEAST | 187 | 189 | 904.724 | 4 | 0.4  | 25.46 |
| 112 | VTGFKDEVLETV-TLVNKSTGLK-a5-b5            | sp P33442 RS3 A1_YEAST | sp P33442 RS3 A1_YEAST | 248 | 50  | 831.456 | 3 | 1.3  | 25.42 |
| 113 | QNDITDGKDYHTLANNVESK-KADVDLHKR-a8-b1     | sp POCX55 RS1 8A_YEAST | sp POCX55 RS1 8A_YEAST | 96  | 49  | 688.544 | 5 | 0.6  | 24.42 |
| 114 | ALQKEQEEQALK-GGTATGGAGKK-a4-b10          | sp Q05775 EIF3 J_YEAST | sp Q05775 EIF3 J_YEAST | 118 | 230 | 604.317 | 4 | -2.8 | 24.37 |
| 115 | EPPSTPSTLPKATVSPDK-AKLDMIAQK-a11-b2      | sp P38249 EIF3 A_YEAST | sp P38249 EIF3 A_YEAST | 889 | 898 | 741.895 | 4 | -1.3 | 24.37 |
| 116 | KADVPPPSADPSK-EIVKSNTSSK-a1-b4           | sp P39015 STM 1_YEAST  | sp P39015 STM 1_YEAST  | 34  | 27  | 832.765 | 3 | -1.2 | 23.52 |
| 117 | ALTAAITPMNKK-GGTATGGAGKK-a11-b10         | sp Q05775 EIF3 J_YEAST | sp Q05775 EIF3 J_YEAST | 166 | 230 | 565.311 | 4 | 0.7  | 22.52 |



**Appendix Table S4 - Molecular interactions between eIF3 subunits and 40S.**

| eIF3a |          |      |            |      |      |      |            |      |            |
|-------|----------|------|------------|------|------|------|------------|------|------------|
| 3a    | eS1      | 3a   | 3c         | 3a   | 3f   | 3a   | 3h         | 3a   | 3m         |
| Q6    | E78      | E125 | K474       | N521 | S232 | N521 | S232       | S444 | K342       |
| N10   | E78      | V132 | N678       | H565 | R109 | A525 | Q314       | I446 | I325       |
| R14   | E78, D77 | R140 | P464, S466 |      |      | E547 | K220       | Y447 | K342       |
| E17   | N75      | R143 | D463       |      |      | H550 | W216       | Q448 | I325       |
|       |          | W246 | P729       |      |      | E564 | H209       | S449 | D326, Q327 |
|       |          | Q247 | Q724       |      |      | R571 | E77        | E451 | Q327       |
|       |          | D337 | K745       |      |      | E576 | R108       | R454 | E309       |
|       |          | L342 | R719       |      |      | R578 | E145, E146 | N512 | C323       |
|       |          | E468 | Y799       |      |      |      |            |      |            |
|       |          | R483 | S797, D800 |      |      |      |            |      |            |
|       |          | I484 | D800       |      |      |      |            |      |            |

| eIF3b |          |      |      |
|-------|----------|------|------|
| 3b    | 18S rRNA | 3b   | uS4  |
| K487  | A560     | R507 | D158 |
| D488  | A560     | V556 | K155 |

  

| 3c-N |              | eIF3c (PCI-MPN core) |          |      |      |      |          |      |            |      |            |      |      |
|------|--------------|----------------------|----------|------|------|------|----------|------|------------|------|------------|------|------|
| 3c   | 18S rRNA     | 3c                   | 18S rRNA | 3c   | eS27 | 3c   | 3d       | 3c   | 3e         | 3c   | 3f         | 3c   | 3h   |
| R47  | C1039, A1181 | K342                 | G929     | G341 | Q65  | D562 | A70      | Y583 | Y286       | Q852 | D333       | Y557 | L210 |
| K55  | C1180        | K343                 | G929     | N388 | Q75  | M591 | Q31      | D587 | Y286       | N870 | N351, Q347 | L859 | M247 |
| K92  | U1178        |                      |          | L389 | Q75  | H593 | P32, G64 | D602 | Y41        |      |            | K862 | M247 |
| K132 | C369         |                      |          |      |      | Q595 | L39      | S820 | N302       |      |            | V873 | N261 |
| K136 | U367         |                      |          |      |      | H600 | H73      | L835 | I347, Q349 |      |            | H876 | N261 |
| Q143 | U367, U368   |                      |          |      |      | D602 | H73      | Q837 | S352       |      |            |      |      |
| K144 | U367         |                      |          |      |      | P603 | W45      | H845 | N395       |      |            |      |      |
|      |              |                      |          |      |      | Q606 | W45      |      |            |      |            |      |      |
|      |              |                      |          |      |      | Y609 | K41      |      |            |      |            |      |      |
|      |              |                      |          |      |      | N610 | A43      |      |            |      |            |      |      |
|      |              |                      |          |      |      | N631 | R38      |      |            |      |            |      |      |
|      |              |                      |          |      |      | D635 | Y59      |      |            |      |            |      |      |
|      |              |                      |          |      |      | R641 | T46      |      |            |      |            |      |      |
|      |              |                      |          |      |      | E666 | W45      |      |            |      |            |      |      |

  

| eIF3d |            |     |          |      |          |      |          |      |     |
|-------|------------|-----|----------|------|----------|------|----------|------|-----|
| 3d    | 3e         | 3d  | uS27     | 3d   | 18S rRNA | 3d   | eS28     | 3d   | uS7 |
| F4    | Y32        | E75 | K36      | R212 | C1470    | Q416 | R51, E52 | K472 | Q29 |
| Q10   | H12        | E77 | R80      |      |          | T423 | R13      | S478 | N31 |
| D11   | R16        | Q81 | S78, F79 |      |          | K426 | F34, T38 |      |     |
| W16   | S167, G171 | V83 | G76      |      |          |      |          |      |     |
| G17   | W170       |     |          |      |          |      |          |      |     |
| A20   | Q209       |     |          |      |          |      |          |      |     |
| Y30   | L208       |     |          |      |          |      |          |      |     |
| F33   | N244, L590 |     |          |      |          |      |          |      |     |
| K35   | Q283, E284 |     |          |      |          |      |          |      |     |

| eIF3e |      |
|-------|------|
| 3e    | 3l   |
| R369  | D480 |
| Y401  | I523 |
| Q416  | D532 |

  

| eIF3f |            |      |      |      |      |      |      |
|-------|------------|------|------|------|------|------|------|
| 3f    | 3h         | 3f   | 3k   | 3f   | 3m   | 3f   | 3l   |
| R108  | D113       | S267 | Q218 | Q280 | N362 | N332 | I523 |
| V163  | Y99        | N328 | E203 | D301 | W347 |      |      |
| S164  | E56        |      |      | R306 | H339 |      |      |
| Y239  | L218, E217 |      |      | N313 | S337 |      |      |
| N260  | K206       |      |      |      |      |      |      |
| R261  | H209, N207 |      |      |      |      |      |      |
| I263  | I205       |      |      |      |      |      |      |
| D268  | Q336       |      |      |      |      |      |      |
| Q271  | S161       |      |      |      |      |      |      |
| P316  | Q348       |      |      |      |      |      |      |
| I318  | Q348       |      |      |      |      |      |      |
| N342  | K331       |      |      |      |      |      |      |
| Q345  | N324       |      |      |      |      |      |      |
| N356  | R313       |      |      |      |      |      |      |

| eIF3h |      |
|-------|------|
| 3h    | 3l   |
| E195  | R545 |
|       | K331 |
|       | S217 |
|       | K345 |
|       | K204 |

  

| eIF3l |      |
|-------|------|
| 3l    | 3k   |
| K534  | S216 |

### **Appendix text 1 - Molecular interactions between eIF3j and the 40S subunit in the yeast 43S-PIC.**

Molecular details of the eIF3j-40S interaction were derived from the high-resolution structure of the cross-linked 43S-PIC (43S-PIC-XL) at an overall resolution of 3.0 Å and a local resolution of eIF3j ranging from 3 to 5 Å (Appendix Fig S4). Ribosome-bound eIF3j forms a dimer folding into a stable entangled 6-helix bundle as observed in crystal structure of human eIF3j (PDB 3BPJ; lacking 137 residues at the N- and 28 residues at the C-terminus). A yeast homology model based on this structure could be unambiguously fitted into the EM density (Fig EV3). It accommodates between the 40S body and head *via* interactions of both protomers. The 40S body is contacted by Arg148 and Arg154 of the N-terminal helix 1 of protomer 1 *via* A542 in the h17-h18 junction and *via* Glu22 of eS30, respectively. This contact to eS30 is also confirmed by the XL-MS data (Appendix Fig S5 and Appendix Table 3). 40S body and head are bridged by the C-terminal helix 3 of protomer 1. Here, Gln195 and Thr199 contact the backbone of eS30 in the body (at Lys15 and Lys20, respectively), while Arg215 contacts G1264 of h33 on the head. Helix 3 of the second protomer projects into the opposite direction and likely contacts Glu31 of eIF1A *via* a basic patch consisting of Lys205, Arg209, and Arg212. Following helix 3, the second eIF3j protomer forms a highly basic loop inside a pocket formed by h33, h34 and eS10 (Figs 4E, F and EV3). Here, Lys230 of eIF3j and Phe59 of eS10 are sandwiching the flipped-out G1435 base of h34. H34 is also contacted by Lys234 (at G1438), whereas Lys231 contacts U1266 and G1267 of h33. The loop is further stabilized by salt bridges between Arg220 and Glu70-Glu71 of eS10. From the loop, the C-terminus projects towards the mRNA entry channel (Fig 4G). It interacts with h18 (*via* Lys236) and then forms several contacts with uS3, mainly *via* hydrophobic interactions between Leu239 and Phe243 with Ile114, Leu142, and Arg143 of uS3 and the flipped-out base of A579 (h18). Finally, the C-terminus is anchored at h18 by the interaction of Lys244 with C559 (phosphate) and U581 (stacking), as well as Lys245 with U581 and U582 (phosphates). From here, the eIF3j C-terminus makes another kink into the mRNA entry channel, in which eleven more residues are visible (Asp246-Phe257). This part is not forming any specific interactions and thus is more flexible.

## Appendix References

des Georges A, Dhote V, Kuhn L, Hellen CU, Pestova TV, Frank J, Hashem Y (2015) Structure of mammalian eIF3 in the context of the 43S preinitiation complex. *Nature* 525: 491-495

Erzberger JP, Stengel F, Pellarin R, Zhang S, Schaefer T, Aylett CHS, Cimermancic P, Boehringer D, Sali A, Aebersold R et al (2014) Molecular Architecture of the 40S eIF1eIF3 Translation Initiation Complex. *Cell* 159: 1227-1228

Liu Y, Neumann P, Kuhle B, Monecke T, Schell S, Chari A, Ficner R (2014) Translation initiation factor eIF3b contains a nine-bladed beta-propeller and interacts with the 40S ribosomal subunit. *Structure* 22: 923-930

Llacer JL, Hussain T, Saini AK, Nanda JS, Kaur S, Gordiyenko Y, Kumar R, Hinnebusch AG, Lorsch JR, Ramakrishnan V (2018) Translational initiation factor eIF5 replaces eIF1 on the 40S ribosomal subunit to promote start-codon recognition. *Elife* 7
